# Supplementary material for: High–Performance Biscrolled Ni–Fe Yarn Battery with Outer Buffer Layer
Source: MDPI journal article supplement (doi:10.3390/ijms24021067), 2023-01-05
Supplement: s1 [file s1]

Supplementary Information

## **High-Performance Biscrolled Ni-Fe Yarn Battery with Outer Buffer Layer**

Jin Hyeong Choi <sup>1,†</sup>, Juwan Kim <sup>1,†</sup>, Jun Ho Noh <sup>1,2</sup>, Gyuyoung Lee <sup>1</sup>, Chaewon Yoon <sup>1</sup>, Ui Chan Kim <sup>1</sup>, In Hyeok Jang <sup>1</sup>, Hae Yong Kim <sup>1</sup> and Changsoon Choi <sup>1,3,\*</sup>

<sup>1</sup> *Department of Energy and Materials Engineering, Dongguk University, 30 Pildong-ro, 1-gil, Jung-gu, Seoul 04620, Republic of Korea*

<sup>2</sup> *Department of Advanced Battery Convergence Engineering, Dongguk University, 30 Pildong-ro, 1-gil, Jung-gu, Seoul 04620, Republic of Korea*

<sup>3</sup> *Research Center, Sillo Incorporation, 30 Pildong-ro, 1-gil, Jung-gu, Seoul 04620, Republic of Korea*

**\*Corresponding author: cschoi84@dongguk.edu (C. Choi)**

<sup>†</sup> These authors contributed equally to this work.

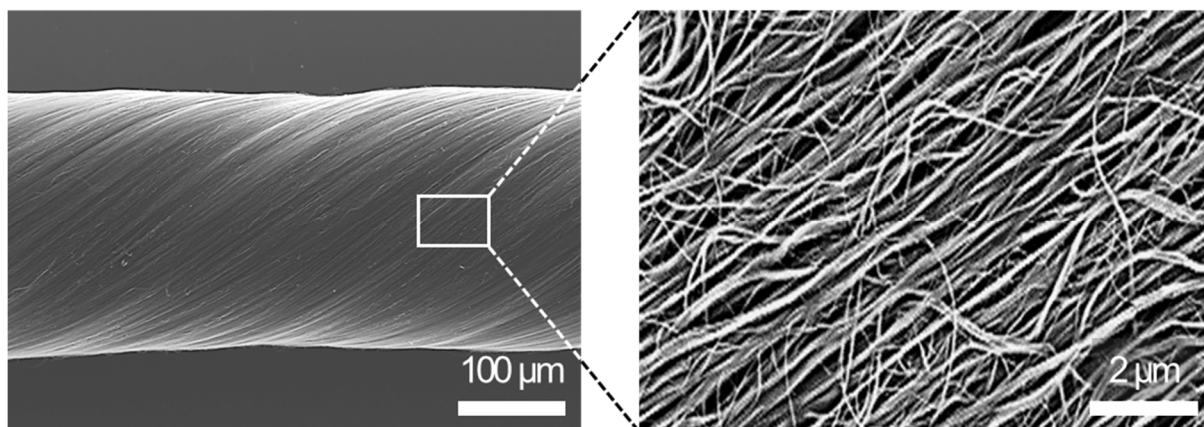

**Figure S1.** SEM images of neat CNT yarn with magnified area of highly oriented CNT bundles with porous structures.

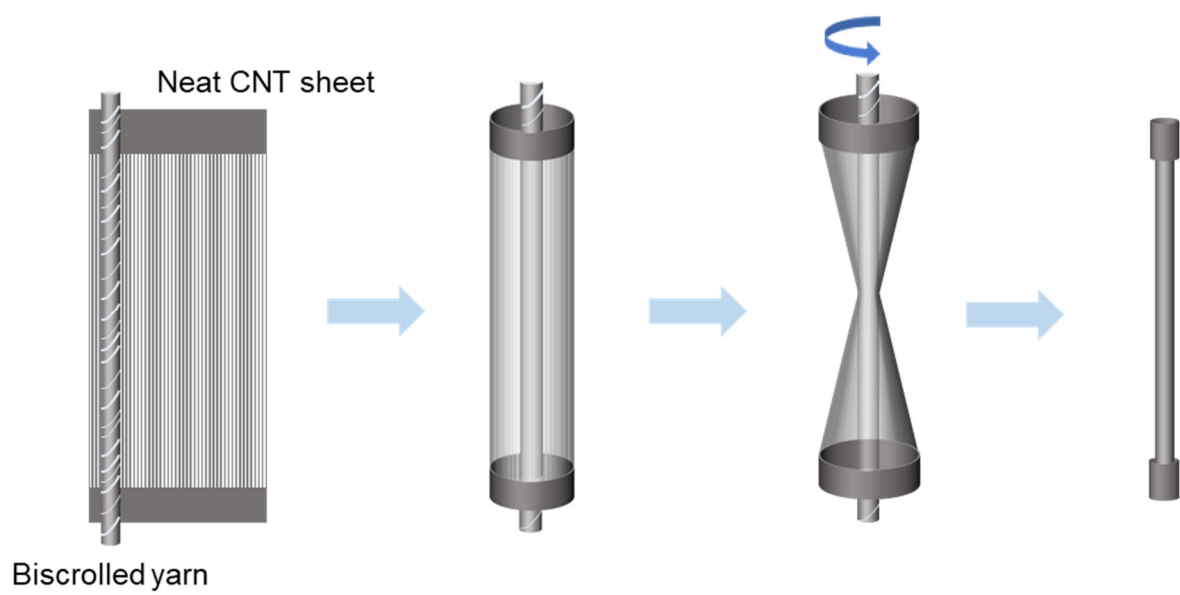

**Figure S2.** Schematics of wrapping process of neat CNT sheets as buffer layers onto biscrolled yarn.

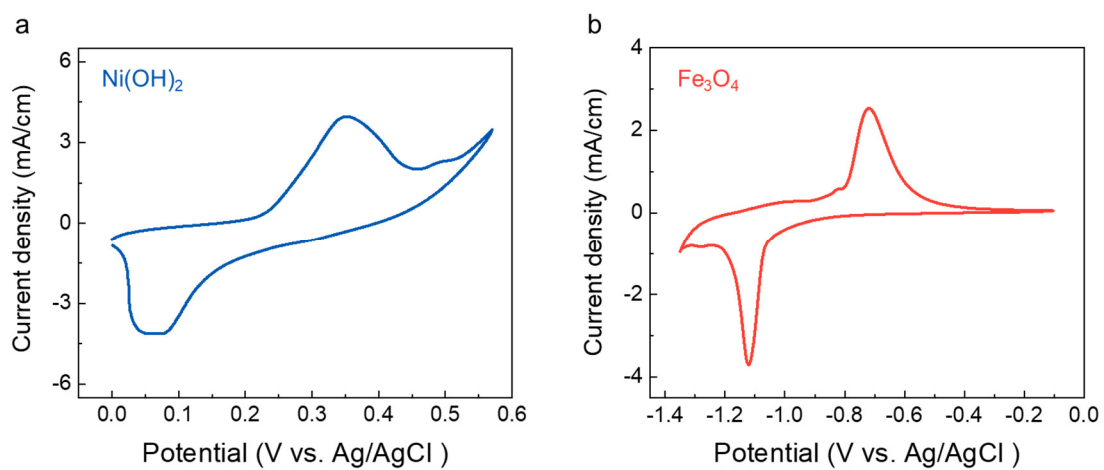

**Figure S3.** CV curves of (a)  $\text{Ni(OH)}_2/\text{CNT}$  biscrolled yarn and (b)  $\text{Fe}_3\text{O}_4/\text{CNT}$  biscrolled yarn at 5 mV/s scan rate.

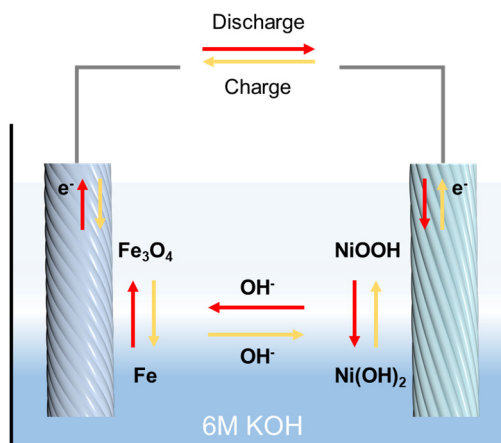

**Figure S4.** Working principle of Ni-Fe battery and involved electrochemical reactions.

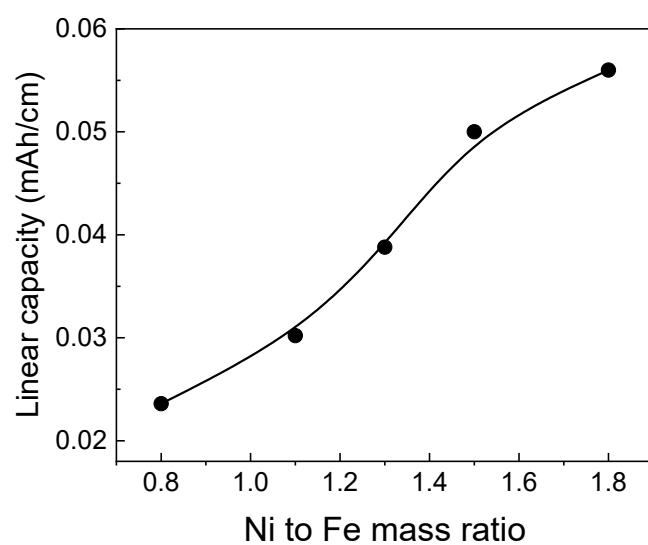

**Figure S5.** Experimentally derived linear capacity as a function of Ni-to-Fe mass ratio (amount of Fe in the anode is constant).

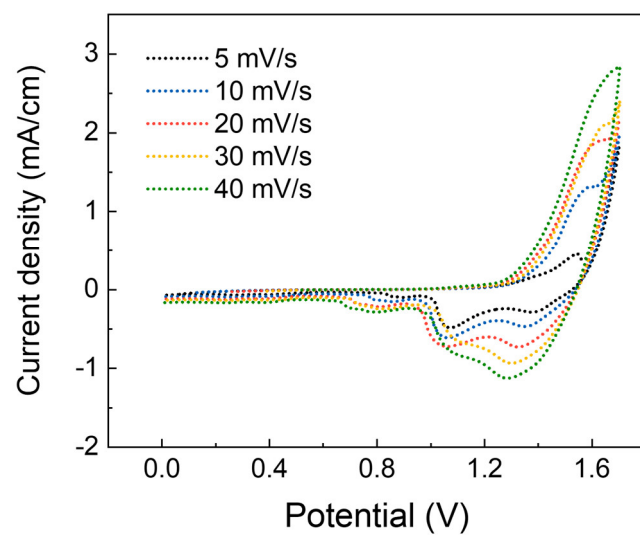

**Figure S6.** CV curves of BNF yarn battery in aqueous 6M KOH at different scan rates.

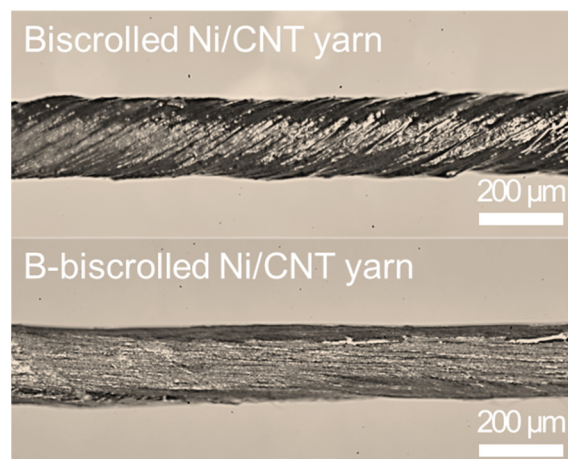

**Figure S7.** Optical images showing biscrolled Ni/CNT yarn (top) and b-biscrolled Ni/CNT yarn (bottom) after charge/discharge cycles.
